# Supplementary material
Source: HighWire-hosted journal article supplement (https://www.cmajopen.ca/highwire/filestream/84925/field_highwire_adjunct_files/3/2020-0323-12-at.pdf)
Supplement: 2020-0323-12-at.pdf [file 2020-0323-12-at.pdf]

### Appendix 12. Mortality by month between March 1 and September 30, 2020

| Level of care                                       | March      | April         | May        | June       | July      | August    | September |
|-----------------------------------------------------|------------|---------------|------------|------------|-----------|-----------|-----------|
| Including all individuals                           |            |               |            |            |           |           |           |
| Frequency (proportion)*                             | 457 (7.9%) | 1,818 (13.4%) | 514 (5.4%) | 100 (1.9%) | 33 (0.9%) | 17 (0.6%) | 98 (1.1%) |
| Excluding individuals from long-term care residents |            |               |            |            |           |           |           |
| Frequency (proportion)*                             | 271 (5%)   | 484 (5%)      | 174 (2%)   | 43 (1%)    | 25 (1%)   | 13 (<1%)  | 55 (1%)   |

\*Proportion is calculated by taking deaths as the numerator of all individuals who had an episode date in that month over the total number infected within that month using the episode date
